# Supplementary material for: Trends in Glucagon-like peptide-1 Receptor Agonists for Weight Loss Prior to Total Joint Arthroplasty
Source: Research Square preprint supplement (doi:10.21203/rs.3.rs-7490872/v1), 2025-10-30
Supplement: Supplementary file 1 [file 473f3489916644a14433139c.docx]

**Supplement Table 1. Codes to identify variables**

| **Variables** | **International Classification of Diseases, 10th Revision (ICD-10)**  **or Current Procedural Terminology (CPT)** |
| --- | --- |
| Obesity | ICD-10  Z68.3, Z68.4, E66.0-E66.2, E66.8, E66.9 |
| Metabolic and bariatric surgery | CPT  43644, 43645, 43659, 43770, 43771, 43772, 43773, 43774, 43775, 43845, 43846, 43847, 43886, 43887, 43888, 43771, 43772, 43773, 43842, 43843  ICD-10  Z98.84, O99.84 |
| Diabetes mellitus | ICD-10  E08-E11, E13 |
| Hypertension | ICD-10  I10-I16 |
| Hypercholesterolemia | ICD-10  E78 |
| Cancer | ICD-10  C00-C26, C30-C34, C37-C41, C43-C58, C60-C76, C81-C86, C88, C90-C96, C77-C8 |
